# Supplementary material
Source: PubMed Central journal article supplement (PMC3033286)
Supplement: 1011379108_pnas.1011379108_SI.pdf [file 1011379108_pnas.1011379108_SI.pdf]

# Supporting Information

Dhar et al. 10.1073/pnas.1011379108

Table S1. Clinical chemistry of rats after treatment with Pt-PLGA-*b*-PEG-NP, cisplatin, and 1 in MTD study

| Dose, mg/kg               | Creatinine variation, mg/dL | Blood urea nitrogen variation, mg/dL | Aspartate aminotransferase variation, U/L | Total protein variation, g/dL | Globulin variation, g/dL |
|---------------------------|-----------------------------|--------------------------------------|-------------------------------------------|-------------------------------|--------------------------|
| Pt-PLGA- <i>b</i> -PEG-NP |                             |                                      |                                           |                               |                          |
| 0                         | 0.3                         | 18                                   | 151                                       | 6                             | 2.3                      |
| 5                         | 0.2                         | 18                                   | 139                                       | 6                             | 1.9                      |
| 10                        | 0.3                         | 19                                   | 142                                       | 7                             | 2.1                      |
| 20                        | 0.2                         | 17                                   | 106                                       | 7                             | 2.2                      |
| 40                        | 0.3                         | 21                                   | 115                                       | 7                             | 2.3                      |
| 50                        | 0.2                         | 12                                   | 72                                        | 4                             | 1.3                      |
| 60                        | 0.3                         | 18                                   | 110                                       | 6                             | 1.9                      |
| Cisplatin                 |                             |                                      |                                           |                               |                          |
| 0                         | 0.2                         | 20                                   | 85                                        | 6                             | 2.2                      |
| 5                         | 0.2                         | 21                                   | 98                                        | 6                             | 2.1                      |
| 10                        | 0.3                         | 20                                   | 91                                        | 6                             | 1.8                      |
| 20                        | 0.8                         | 46                                   | 91                                        | 6                             | 2.1                      |
| 40                        | 2.1                         | 109                                  | 198                                       | 5.2                           | 1.6                      |
| Pt(IV)-prodrug, 1         |                             |                                      |                                           |                               |                          |
| 0                         | 0.3                         | 18                                   | 105                                       | 6.2                           | 1.8                      |
| 5                         | 0.4                         | 21                                   | 144                                       | 6.5                           | 1.9                      |
| 10                        | 0.4                         | 23                                   | 160                                       | 7.2                           | 2.2                      |
| 20                        | 0.4                         | 22                                   | 144                                       | 6.9                           | 1.9                      |
| 40                        | 0.4                         | 20                                   | 120                                       | 6.7                           | 1.8                      |
